# Supplementary material for: A Phase I/II Study Targeting Angiogenesis Using Bevacizumab Combined with Chemotherapy and a Histone Deacetylase Inhibitor (Valproic Acid) in Advanced Sarcomas
Source: MDPI journal article supplement (doi:10.3390/cancers10020053), 2018-02-17
Supplement: s1 [file s1]

## Supplementary Material

# A Phase I/II Study Targeting Angiogenesis Using Bevacizumab Combined with Chemotherapy and a Histone Deacetylase Inhibitor (Valproic Acid) in Advanced Sarcomas

Varun Monga, Umang Swami, Munir Tanas, Aaron Bossler, Sarah L. Mott, Brian J. Smith and Mohammed Milhem

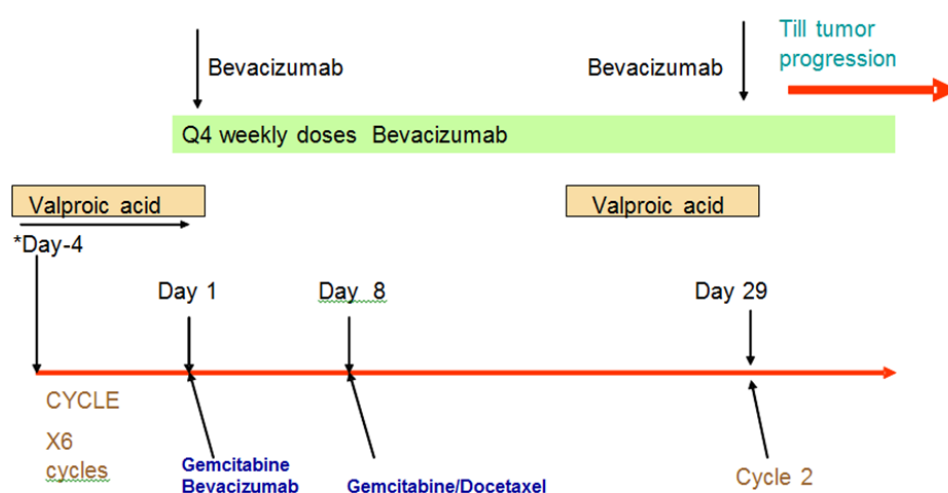

### Legend

- Valproic acid (VPA) dose 40mg/kg given for 5 days prior to each cycle (\*days -4,-3,-2,-1 and 1)
- Bevacizumab 15mg/kg Q 4 weeks
- Gemcitabine 900mg/m<sup>2</sup> on D1 and D8 to be given over 90min
- Taxotere 75mg/m<sup>2</sup> over 1 hour on D8 after the Gemcitabine.
- Total of 6 cycles were given and disease assessed every 2 cycles with imaging
- After 6 cycles bevacizumab and VPA were continued as maintenance until disease progression

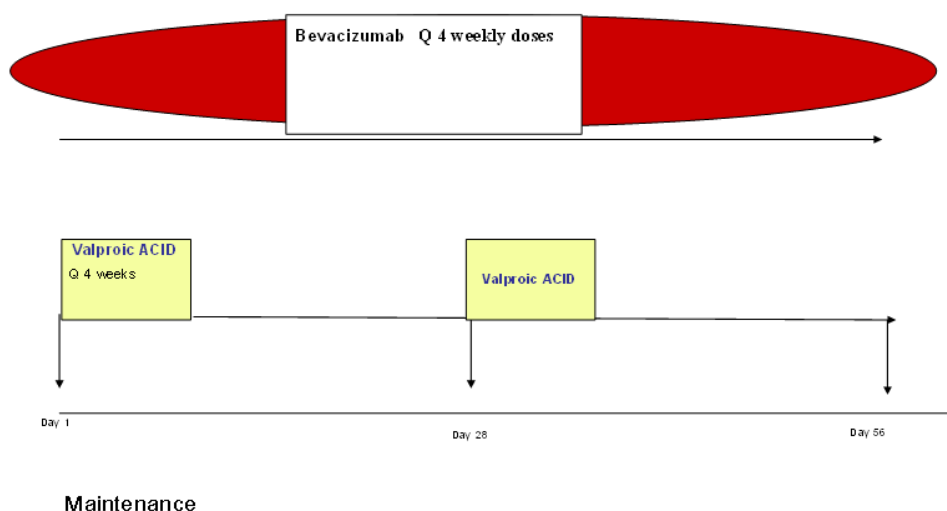

**Figure S1.** Schematic representation of the treatment plan and different doses of drugs used. During maintenance phase patients received Bevacizumab at 15mg/kg Q 4 weeks and Valproic acid at 40mg/kg q 4 weeks for 5 days until tumor progression.
